## STUDY PROTOCOL

# Effects of physical exercise on executive functions of individuals with schizophrenia spectrum disorders: Protocol for a systematic review and meta-analysis

Nuria Pérez-Romero<sup>1</sup>, Christian Campos-Jara<sup>2</sup>, Caterina Pesce<sup>3</sup>, Sergio Araya Sierralta<sup>4</sup>, Enrique Cerda-Vega<sup>2</sup>, Rodrigo Ramirez-Campillo<sup>5</sup>, Rodrigo Campos-Jara<sup>6</sup>, Cristian Martínez-Salazar<sup>7</sup>, Cristián Arellano-Roco<sup>8</sup>, Falonn Contreras-Osorio <sup>2\*</sup>

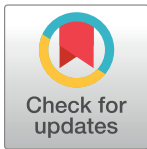

**1** Exercise and Rehabilitation Sciences Institute, Postgraduate, Faculty of Rehabilitation Sciences, Universidad Andres Bello, Santiago de Chile, Chile, **2** Exercise and Rehabilitation Sciences Institute, Faculty of Rehabilitation Sciences, Universidad Andres Bello, Santiago de Chile, Santiago, Chile, **3** Department of Movement, Human and Health Sciences, University of Rome “Foro Italico”, Rome, Italy, **4** Departamento de Educación Física, Universidad de Atacama, Copiapó, Chile, **5** Exercise and Rehabilitation Sciences Institute, School of Physical Therapy, Faculty of Rehabilitation Sciences, Universidad Andres Bello, Santiago de Chile, Santiago, Chile, **6** Hospital Mauricio Heyermann, Servicio de Psiquiatría, Angol, Chile, **7** Department of Physical Education, Sports, and Recreation, Pedagogy in Physical Education, School of Education and Social Sciences and Humanities, Universidad de La Frontera, Temuco, Chile, **8** Laboratorio de Neuromecánica Aplicada, Escuela de kinesiología, Facultad de Ciencias Médicas, Universidad de Santiago de Chile, Santiago, Chile

\* [falonn.contreras@unab.cl](mailto:falonn.contreras@unab.cl)

## OPEN ACCESS

**Citation:** Pérez-Romero N, Campos-Jara C, Pesce C, Araya Sierralta S, Cerda-Vega E, Ramirez-Campillo R, et al. (2024) Effects of physical exercise on executive functions of individuals with schizophrenia spectrum disorders: Protocol for a systematic review and meta-analysis. PLoS ONE 19(1): e0296273. <https://doi.org/10.1371/journal.pone.0296273>

**Editor:** Rafael Enrique Reigal, Universidad de Málaga, SPAIN

**Received:** June 19, 2023

**Accepted:** December 4, 2023

**Published:** January 2, 2024

**Copyright:** © 2024 Pérez-Romero et al. This is an open access article distributed under the terms of the [Creative Commons Attribution License](https://creativecommons.org/licenses/by/4.0/), which permits unrestricted use, distribution, and reproduction in any medium, provided the original author and source are credited.

**Data Availability Statement:** No datasets were generated or analysed during the current study. All relevant data from this study will be made available upon study completion.

**Funding:** The author(s) received no specific funding for this work.

**Competing interests:** The authors have declared that no competing interests exist.

## Abstract

### Introduction

Executive functions are commonly impaired in individuals with schizophrenia spectrum disorders. Physical exercise has the potential for improving executive functions and can be easily implemented as a therapeutic method. However, there are only few systematic reviews of exercise effects in schizophrenia including cognitive outcomes, and no meta-analytical syntheses of effects on “cool” and “hot” executive functions. The purpose of this systematic review and meta-analysis will be to determine the effects of physical exercise on “cool” and “hot” executive functions of adults with schizophrenia spectrum disorders.

### Methods and analysis

This protocol was guided by PRISMA-P guidelines. Studies will be searched using combinations of keywords and medical terms in the Web of Science, PubMed, Scopus, and EBSCO databases. Inclusion criteria will be determined as per PICOS approach. The risk of bias will be assessed using the Cochrane RoB2 tool. The certainty of evidence (per outcome) will be assessed using the GRADE method. The meta-analyses will be performed using the DerSimonian and Laird random effects model. Effect sizes (Hedges’ g) with 95% confidence intervals will be calculated for each main outcome.

## Conclusions

The results of this review may be useful for mental health professionals to design treatment plans for adults with schizophrenia spectrum disorders, offering potential benefits related to the quality of life and cognitive abilities of this population.

## PROSPERO registration number

[CRD42023392295](https://doi.org/10.1186/1745-6215-42023392295).

## Introduction

Schizophrenia is considered a devastating disease because of the associated social and neuro-cognitive disorders, which can prevent patients from achieving their professional and life goals [1–3]. This diagnosis is currently considered a spectrum since the release of the fifth version of the Diagnostic Statistical Manual (DSM-V) [4], which eliminates the conception of schizophrenia and its subtypes. This makes it possible to approach this condition in a more homogeneous and comprehensive way, as it considers the diversity both in the severity and persistence of its symptoms [5, 6]. Schizophrenia spectrum is characterized by the presence of psychotic symptoms—e.g., vivid perceptions in the absence of an external stimuli (hallucinations), or correctly sensed stimuli that are given improper additional significance (delusional perceptions), and difficulty in keeping thoughts straight (disorganized thinking)—and, occasionally, abnormal awake states lacking movement and communication in response to other people and their environment (catatonia) [7].

In addition to general and other symptoms that are specific to the spectrum, schizophrenia is characterized by early cognitive impairments that are initially maximal for functions as verbal memory and lower-level cognition as information processing speed [8, 9] but expand, in chronic schizophrenia, into a broader array of higher-level cognitive functions including attention, problem solving, executive functions and social cognition [10–12]. In a recent umbrella review [13], 63 systematic reviews analyzing cognitive functions in individuals with schizophrenia were identified. The study [13] observed that those diagnosed with schizophrenia exhibit more pronounced cognitive impairment compared to both healthy controls and individuals with other affective disorders. This is especially notable in the areas of processing speed, verbal memory, and working memory, irrespective of their pharmacological treatment [13].

Executive functions are understood as a range of higher-order cognitive skills that allow for the supervision and control of emotions, behaviors, and other mental processes in voluntary tasks with processing demands that are directed to the analysis of information from multiple sources, decision making, goal achievement, or flexible response to environmental demands [14, 15]. Social cognition may be conceived as a ‘hot’ executive function that, compared to those of a more cognitive type (‘cool’ executive functions as cognitive flexibility), are of more socio-emotional type [16]. Indeed, social cognition entails domains of emotion processing and theory of mind, which are impaired in schizophrenia [17, 18]. Although ‘cool’ and ‘hot’ executive functions have their main substrate in different areas of the prefrontal cortex (dorsolateral and ventromedial, respectively), they share more neural networks than lower-level cognitive functions due to their higher-order nature. Thus, their impairment in schizophrenia is associated with more generalized structural brain abnormalities (e.g., brain regions with reduced volume) in more networks [10–12]. Cool and hot executive functions, along with attention

skills and processing speed have been determined to be predictors of global functional outcome—including self-care, work outcomes, and social functioning—both in patients with early-onset psychosis and chronic schizophrenia [19, 20].

Neurocognitive impairments are reported to appear before other clinical symptoms become evident and can persist after they are controlled, showing little response to pharmacological treatment. They can also predict the onset of psychosis and mortality in schizophrenia spectrum disorders [10, 11, 21, 22]. Other factors that may further increase the mortality rates include the following: the presence of unhealthy lifestyles, which include unhealthy habits such as smoking, sedentary lifestyle, or alcohol abuse; associated medical conditions, e.g., cardiovascular diseases or metabolic abnormalities; and a high risk of suicide. These associated factors may reduce the life expectancy of the patients to 15–20 years lower than that of the general population [23–26].

People with schizophrenia are more sedentary than healthy controls of the same age and sex, a trend that is maintained when quantifying the mean daily physical activity of a moderate to vigorous intensity, where people with schizophrenia were found to be the least active (on average 37.5 min/day of moderate-to-vigorous physical activity, 95% confidence interval [CI]: 29.1–46.0) within this array of medical conditions [27]. These antecedents are of great importance when considering that young to late middle-aged adults with schizophrenia are 3.6-fold more likely to die from cardiovascular diseases as compared to the general population (mortality rate: 403.2 per 100,000 person-years) [28]. A sedentary lifestyle and a low level of physical activity among people with schizophrenia are also associated with worse cognitive performance [29]. Physical exercise interventions in this population can improve cognitive performance, and reduce negative and positive symptoms [27, 30, 31]. Cognitive improvements have been associated with an increase in hippocampal volume [32], an area usually affected from the early stages of schizophrenia [30, 33]. Additionally, physical exercise in people with schizophrenia may reduce use of medications, decreasing their side effects, and provide an additional therapeutic option with impact in areas of functioning where medications have been shown to provide only limited improvements (e.g., on impaired cognitive skills) [30, 34, 35].

Taken together, this evidence suggests that promoting interventions that aim to control modifiable cardiovascular risk factors (such as physical inactivity) become a public health priority for vulnerable populations like this one [36]. Indeed, physical activity and exercise can be used as primary or adjuvant therapy to improve clinical symptoms (positive, negative, and cognitive symptoms), quality of life, and global functioning, as well as neuroplasticity and neurogenesis [35, 37–42]. To address the therapeutic value of being active for individuals with schizophrenia spectrum disorder, the terms ‘physical activity’ and ‘physical exercise’ must be differentiated. The first refers to any bodily movement that involves energy expenditure through skeletal muscles [43]. Within this broader term, ‘exercise’ is a specific form of physical activity that is planned and structured, with the aim of improvement or maintenance not only of physical but also mental health. Furthermore, exercise interventions may consist of single bouts aimed at reaping transient benefits (acute exercise) or continuative practice over weeks to years aimed at reaping long-term effects (chronic exercise).

## Review rationale

In chronic exercise studies with people with schizophrenia, a relationship has been found between exercise and cognition as a function of the quantitative parameters of the exercise intervention (frequency, intensity, and duration) [37–39]. Among the different exercise modalities, major attention has been devoted, as traditionally in exercise-cognition research with healthy populations [44], to aerobic exercise also with persons affected by schizophrenia

[30, 31, 37, 40, 45, 46]. Firth and colleagues [35] and Shimada and colleagues [33] reported that aerobic exercise causes significant improvements of medium to large size in global cognition, working memory, and attention. Firth et al. [35] also found large effects on social cognition, while Xu et al. [47] found no beneficial effects of aerobic exercise on working memory and attention, but only on other higher-level, 'cool' executive functions (reasoning and problem solving). However, those reviews neither provided a thorough analysis of the effects of physical exercise on executive functions, nor contrasted the effects on 'cool' and 'hot' executive functions that might further our understanding of the effect of physical exercise on more cognitive vs. more socio-emotional aspects of executive functioning.

Moreover, beyond the metabolic demands of aerobic exercise that may trigger neurobiological and -physiological mechanisms that explain the effects on brain health and cognitive functioning, also the qualitative characteristics of exercise, as the type of exercise, have attracted increasing attention in exercise-cognition research [48]. Both the general and specific benefits of physical exercise on cognition in patients diagnosed with schizophrenia have been studied in previous narrative and systematic reviews, covering and merging different types of exercise [30, 31, 37, 45, 46, 49], or looking at the efficacy of combined physical and cognitive training [49], or focusing specifically on aerobic exercise [30, 33, 35, 47], holistic movement practices (e.g., yoga) [50], and mindful exercise [51]. However, these reviews did not contrast the effects on executive functions of different types of exercise considering, beyond their quantitative metabolic demands (e.g., aerobic vs. resistance or high-intensity training), also their qualitative levels of cognitive challenge (e.g., soccer, mindful movements). Lastly, not only the quantitative and qualitative characteristics of the physical exercise tasks matter. There is emerging interest for the role of the exercise context, conceived not merely as the background of the exercise intervention, but also as a moderator of exercise effects on cognition [52] and, more broadly, of exercise effects on mental health [53]. For example, the outdoor environment may have stress-relief and attention restoration properties, and the group delivery or team play may trigger social interaction that amplify the efficacy of the exercise dose on executive function [52].

When considering the assumptions by Shojania et al. [54] regarding the speed with which systematic reviews become outdated (and, in this sense, 50% of them would become obsolete within 5 years in emerging areas such as mental health), is advisable to promote regular literature reviews so as to provide updated evidence that facilitates decision-making concerning the treatment of people with schizophrenia. In our case, only two previous systematic reviews addressed a similar topic in the last 5 years [33, 47]. However, these studies only focused on the effects of aerobic exercise on the cognitive domains established by the MATRICS Consensus Cognitive Battery (MCCB) [55, 56], without specifically analyzing two of the main dimensions of executive function (inhibitory control and cognitive flexibility).

Additionally, a novel approach in this systematic review will be the inclusion of the cognitive outcomes core executive functions (inhibition, working memory, cognitive flexibility) related to the "cool" executive functions, and also the inclusion of the outcome social cognition, emotion regulation, emotion recognition, and decision making, related to "hot" executive functions. Another novel approach in this systematic review will be the analyses of potential moderators (e.g., exercise frequency; exercise intensity; exercise duration; indoor/outdoor exercise; individual/group exercise; aerobic/anaerobic exercise) on the effect of physical exercise on executive functions.

In summary, this systematic review aims to provide a current perspective on how different types of exercises may impact the executive functions of individuals with schizophrenia, addressing limitations observed in previous studies. For instance, our protocol considers includable all forms of exercise, overcoming a significant constraint in prior reviews that

limited their review to a specific/single form of exercise (e.g., aerobic; yoga). Additionally, our protocol considers separate analysis for "hot" and "cold" executive functions, deepening our understanding of their key underlying variables. This innovative approach will enhance the comprehension of exercise and its potential effects on cognitive and socioemotional aspects of executive functions, paving the way for more personalized (and potentially effective) therapies. Further, by exploring a diverse range of moderators (e.g., type of exercise, intervention duration, social support), the study seeks to offer specific recommendations for implementing exercise programs in clinical settings with a more holistic approach, marking a significant advancement in this field.

## Objectives

Therefore, the objective of the present study is to synthesize the scientific literature currently available on the effects of physical exercise concerning the 'cool' and 'hot' executive functions of adults diagnosed with schizophrenia spectrum compared with an active or passive control condition, through a systematic review with meta-analysis. Additionally, this study aims to analyze the effects of different characteristics of physical exercise (e.g., type, intensity, duration) and social moderators (e.g., level of social support, family structure, academic level) on different executive functions in population diagnosed with schizophrenia spectrum. It is anticipated that results from this systematic review would provide updated and relevant information for the potential generation of intervention programs aimed to positively influence higher order cognitive functions (cool and hot executive functions) closely linked to the functional performance and prognosis of people diagnosed with schizophrenia spectrum, facilitating therapeutic decision making [57, 58].

## Methods and analysis

This protocol was guided by PRISMA-P guidelines [59], and the methodology described in some sections of this protocol follows that performed by Contreras-Osorio et al. [60].

## Eligibility criteria

The inclusion and exclusion criteria are described using the PICOS strategy and are displayed in [Table 1](#).

Physical exercise is defined as a planned, structured, and repetitive body movement aimed at improving or maintaining one or multiple outcomes (e.g., physical, cognitive) [61, 62], thus extending its effects to the field of mental health [63, 64]. The minimum duration of the intervention will be established according to previous literature, as cognitive improvements have been described after the fourth week for physical exercise interventions in people with schizophrenia [65]

The outcomes must be reported using previously validated instruments to assess 'cool' or 'hot' executive functions (e.g., working memory, inhibition, cognitive flexibility, decision-making, social cognition, emotion regulation or emotion recognition) in adults. Some examples of valid instruments: N-back task [66] to assess working memory, the Flanker task to assess inhibition [67], the Trail Making Test-Part B to assess cognitive flexibility [68], the Iowa gambling task to assess the affective decision-making ability [69] or the Non-verbal emotion recognition task to assess the accuracy of judging nonverbal emotions [70]. Studies that use indirect evaluation instruments—meaning that they evaluate the opinion of a third party regarding the user's performance or self-report questionnaires—will not be considered.

Table 1. Eligibility criteria.

|              | Inclusion                                                                                                                                                                                                                                                                             | Exclusion                                                                                                                                                                                                                                   |
|--------------|---------------------------------------------------------------------------------------------------------------------------------------------------------------------------------------------------------------------------------------------------------------------------------------|---------------------------------------------------------------------------------------------------------------------------------------------------------------------------------------------------------------------------------------------|
| Population   | Adult individuals (age, 18–60 years) diagnosed with schizophrenia spectrum according to the Diagnostic and Statistical Manual of Mental Disorders DSM-5 or its equivalents in DSM-I, II, III, III-R, IV, or IV-TR, or in the International Classification of Diseases (ICD-9, 10, 4). | Children, adolescents, or older adults.<br>Patients with other major disorders, such as bipolar disorder or dementia.<br>Patients with limited physical activity (e.g., cardiopulmonary disease).<br>People with intellectual disabilities. |
| Intervention | Interventions involving physical exercise programs with a duration of at least four weeks, without restrictions regarding the type of exercise (e.g., multicomponent, aerobic, sports programs, or yoga).                                                                             | Acute interventions (one single session) or interventions not related to physical exercise.                                                                                                                                                 |
| Comparator   | Control group with the same diagnosis that is not exposed to the intervention program. It can be active (e.g., relaxation techniques) or passive (continuing with their daily activities or waiting list).                                                                            | Absence of a control group.                                                                                                                                                                                                                 |
| Outcomes     | Pre- and post-intervention data from at least one instrument of direct application of 'cool' or 'hot' executive functions that has been previously validated, (e.g., Trail Making Test, Flanker task, N-back task or Iowa gambling task).                                             | Indirect evaluation measures of the executive function.<br>Self-report questionnaires.                                                                                                                                                      |
| Study design | Randomized and non-randomized longitudinal studies.                                                                                                                                                                                                                                   | Cross-sectional studies; case studies.                                                                                                                                                                                                      |

<https://doi.org/10.1371/journal.pone.0296273.t001>

## Sources of information

The review will include the following databases: PubMed, Web of Science, EBSCO, and Scopus. Studies that meet the eligibility criteria found through other sources (e.g., references from review studies found in databases) will also be incorporated. Finally, studies suggested by external experts ( $n = 2$ ), chosen through the Expertscape ranking, will also be added. The experts will be selected using the terms "Executive function" in the link: <https://www.expertscape.com/ex/executive+function>. The search will begin after acceptance of the protocol for publication. Pilot tests of the search strategies were carried out in January of 2023.

## Search strategy

Two authors (F.C.-O. and N.P.-R.) will carry out the systematic search, without restrictions to the sex of the participants, or the date of publication. The search for articles in the different databases will begin once the protocol has been accepted for publication. To do this, the above-mentioned search strategies will be applied using medical subject headings (MeSH) and free-text terms (Table A1 in [S1 Appendix](#)).

**Selection process.** The selection of the studies that comprise the review will be recorded using a flowchart, as established in the PRISMA guidelines [71], detailing the selection process and the corresponding reasons for exclusion. After the identification of the documents through databases, duplicates will be removed using a bibliographic reference management software package. Manual deletions are considered, if needed (N.P.-R.). The titles and abstracts will be subsequently read, where two authors will appraise their eligibility (F.C.-O. and N.P.-R.). Reference lists of included articles and reviews identified during the search process will also be assessed to select potentially eligible studies. Should there be any discrepancies regarding the decision of the authors, they will be resolved by consensus with a third author (C.C.-J.).

## Data extraction and management

For each of the studies included, the following data will be identified: year of publication, author, sample size, characteristics of participants (sex, age, fitness level, psychiatric diagnosis and severity, comorbidities, pharmacological treatment, and social-related information [e.g.,

level of social support, family structure, academic level]), description of the physical exercise program, weekly frequency of the intervention, duration of the intervention (in weeks), duration (in minutes) and intensity of sessions and/or exercises (e.g., heart rate; Borg scale), dimensions of the executive function assessed (working memory, inhibition, and cognitive flexibility), tasks or test used for assessment (e.g., Trail Making Test-Part B [72] to assess cognitive flexibility, N-Back [66] to assess working memory, Stroop [67] to assess inhibition), and description of the control condition.

The means and standard deviation values of each outcome will be registered, considering the period before and after the intervention. Data extraction will be performed by one author (F.C.-O.) and will be verified by a second author (N. P.-R.). Each author will store the data in a Microsoft Excel spreadsheet (Microsoft Corporation, Redmond, WA, USA) independently. Any conflict will be resolved by consensus with a third author (R.R.-C.). Should the data not be clearly or completely contained in the document, the contacting procedures for the authors described in the previous literature will be applied [60, 73, 74]. In this sense, the authors of these studies will be contacted up to a maximum of two times within a period of two weeks. Should there be no answer, or a lack of data required, the study will be excluded from the analysis. When the data are represented in graphs or figures, two of the authors (FC-O. and NP-R.) will use a validated software ( $r = 0.99$ ,  $p < 0.001$ ) [75] (WebPlotDigitizer, version 4.5, Pacifica, CA, USA; <https://apps.automeris.io/wpd/>) to extract the numerical data necessary to calculate Cronbach's Alpha. Should any discrepancies arise, these will be resolved by consensus with a third author (C.C.-J.).

### Risk of bias of individual studies

As in previous studies in the field [76–79], the risk of bias will be assessed using the second version of the Cochrane RoB tool (RoB2) [80] for randomized trials, classifying them as low, some concerns or high risk according to the analysis of five domains: randomization process, deviations from intended interventions, missing outcome data, measurement of the outcome, and selection of the reported result. The risk of bias will be evaluated by two authors (F.C.-O. and C.C.-J.) independently, resolving discrepancies with a third author (N.P.-R.). Regardless of the results derived after the application of the RoB2, all studies that meet the inclusion criteria will be considered for the analyses, although the interpretation and discussion of the outcomes will consider the RoB2 results.

In addition, the GRADE method (Grading of Recommendations, Assessment, Development and Evaluation) will be applied to synthesize and assess the certainty on the evidence for each outcome [81], with the categorization high, moderate, low, or very low [82, 83].

### Qualitative data synthesis

The key characteristics and important questions from the included studies in relation to the aim of this review will be summarized in tables. The characteristics of the participants for the included studies will be recorded, including the number of participants in experimental and control groups, sex (female/male), age (years), diagnosis (type; test; severity), baseline cognitive status, co-morbidities, and co-treatments (e.g., medication). The main characteristics of the interventions (and control condition) implemented in the included studies will also be recorded: description of the exercise program (e.g., type of exercises), level of compliance with the intervention program (e.g., percentage of total sessions completed; average number of sessions completed), total duration of intervention (weeks), weekly training frequency, duration of each session (minutes), intensity (e.g., percentage of maximum heart rate; percentage of

heart rate reserve), test used to measure executive function (e.g., flanker task; Iowa gambling task).

### Meta-analysis

Whether if a meta-analysis on a given outcome is possible or not will be determined when data have been extracted. It is expected to analyze the outcomes i) “cool” executive functions, also involving the isolated analysis for working memory, inhibition, and cognitive flexibility, and ii) “hot” executive functions, also involving the isolated analysis for social cognition, decision making, emotion regulation, and emotion recognition. At least three studies will be required to perform the meta-analysis per each outcome measure [84, 85] due to the usually low number of participants in the studies published in this area [86]. The Hedges’ effect size (ES) will be estimated with 95% confidence interval (CI) and its prediction interval. The ES will be estimated based on the mean and standard deviation before and after the intervention period in the experimental groups compared to the control. Should these studies present data other than mean values and/or standard deviation, appropriate statistical conversions will be performed prior to meta-analysis. The standard deviation after the intervention will be used to standardize the data. The DerSimonian and Laird methods will be applied for the meta-analysis.

The estimated ES will be assessed using the following categorization: <0.2 trivial, 0.2–0.6 small, >0.6–1.2 moderate, >1.2–2.0 large, >2.0–4.0 very large, and >4.0 extremely large [87]. Of note, outlier ES values were sought to be identified. An outlier is an extreme case that seems to be well separated from the rest of the data [88] and in a meta-analysis or meta-regression can affect its validity and robustness [89], and the interpretations, conclusion and inferences derived from it. Although there is no a single method to identify an outlier study [88], in physical exercise intervention studies, ES values  $\geq 3.0$  (i.e., improvement of  $\geq 3$  standard deviations from the mean) are unlikely after most interventions, and thus will be considered outliers [88].

In studies including more than one intervention group and one single control group, the sample size of the control group will be divided proportionally to facilitate comparison between several groups. The degree of heterogeneity will be assessed using the  $I^2$  statistic, with values of <25%, 25–75% and >75% which indicate low, moderate, and high levels, respectively [83].

The risk of publication bias will be assessed for continuous variables ( $\geq 10$  studies per outcome) using Egger’s test [79, 90]. To adjust for publication bias, a sensitivity analysis will be performed using the trim-and-fill method [91], with L0 being the default estimator for the number of missing studies [92]. A multivariate DerSimonian and Laird random-effects model meta-regression will be conducted to verify if any of the continuous moderators (e.g., training frequency; training duration; total number of intervention sessions) explained the effects of interventions on the dependent variables. The computation of meta-regression will be performed with at least 10 studies per covariate [93]. Additionally, a sensitivity analyses will be performed to assess the robustness of the summary estimates (e.g., p-value, ES,  $I^2$ ). To examine the effects of each result from each study on the overall findings, results will be analysed with each study deleted from the model (automated leave-one-out analysis). All analyses will be performed using the Comprehensive Meta-Analysis software (version 2, Biostat, Englewood, NJ, USA). Statistical significance will be established at  $p \leq 0.05$ .

### Moderators

Potential moderators [33, 94–100] on the response of executive functions to exercise will be analyzed, including: exercise intensity, intervention duration (weeks), weekly training volume



(minutes), type of exercise (e.g., aerobic exercise; resistance exercise; High Intensity Interval Training; yoga; multicomponent), combined (successive) or integrated (dual task) physical and cognitive training, outdoor/indoor exercise, and individual/group/team exercise mode (i.e., lowest to highest social interaction level). Social moderators on the response of executive functions to exercise will also be considered as level of social support, family structure, or academic level [11, 101].

Where appropriate, analyses will be split using the median split technique. The median will be calculated when at least three studies provide data for a given moderator (for each of their categories). When two experimental groups with the same information for a given moderator are included in a study, only one of the groups will be considered to avoid undue influence in the calculation of the median. Furthermore, to minimize heterogeneity, median values will be calculated using only those studies that provide data for the outcome analyzed instead of using an overall median value for a given moderator.

## Discussion

The aim of this systematic review is to analyze the effects of physical exercise intervention programs on 'cool' and 'hot' executive functions (e.g., working memory, inhibition, cognitive flexibility, social cognition, decision making, emotion regulation and/or emotion recognition skills) of adults diagnosed with schizophrenia spectrum, in comparison with an active or passive control condition. The information derived from this systematic review (and meta-analysis) could be useful for mental health professionals who plan to establish rehabilitation treatments for patients with a diagnosis related to schizophrenia and its spectrum, thus contributing to improve their quality of life and prognosis [33, 37].

According to the World Health Organization [102], schizophrenia is related to a high level of stigma and difficulty in receiving psychological care. Therefore, analyzing the benefits offered by other therapeutic options, such as physical exercise programs, contributes to increasing access to low-cost alternative treatments. Moreover, physical exercise can even reduce the side effects of medication, while improving health and reducing mortality in patients with this type of disorder [37]. However, regarding its effect on cognitive abilities, the scientific community concludes that further research is necessary, as mixed outcomes have been described [33, 35, 50, 51].

It should be mentioned that there is an absence of systematic reviews that specifically analyze the effects of physical exercise programs on the "cool" and "hot" executive functions. This is a gap that the present study intends to cover, and which is related to the importance of these cognitive skills in the daily functioning of adults with schizophrenia [103]. However, the limitations that arise because of the analysis of the outcomes will be studied to offer possible solutions and future related lines of research that contribute to enriching scientific knowledge.

The adaptive response of executive functions to exercise will be analysed as per possible moderators, including quantitative and qualitative characteristics of the exercise, but also in relation to the characteristics of the context (e.g., exercise performed as individual/group/team) and social moderators (e.g., level of social support, family structure, academic level). This would allow a new perspective of analysis, that incorporates the socio-emotional characteristics of the training programs. Additionally, the methodological evaluation of the selected studies, will offer relevant information that should be considered to improve the quality of future research. Finally, a peer-reviewed scientific journal will be considered for the publication of this systematic review and the final outcomes will be disseminated with the greatest possible social outreach, mainly focusing on professionals and patients related to schizophrenia spectrum.

In summary, this research stands out for its updated synthesis and planned quantitative assessment of the impact of physical exercise on executive functions in adults diagnosed with schizophrenia spectrum disorders. It goes beyond previous systematic reviews by including variables (e.g., 'hot' executive functions) and moderators (e.g., characteristics of the context, social moderators) that were overlooked in the existing literature. Additionally, this systematic review will analyze recently published studies, which were not considered in prior systematic reviews. Indeed, the rapid rate of published scientific articles in the field suggest the need for an update. For example, a rapid search in PubMed with the terms "schizophrenia"[All Fields] AND ("exercise"[All Fields]) retrieved 1,141 documents, and >50% of these documents were published between 2016–2023. Additionally, the study evaluates the impact of physical exercise across all its forms, addressing a limitation pointed out by Shimada et al. [33]. Moreover, it delves into both 'cool' and 'hot' executive functions, providing a thorough analysis of cognitive and socioemotional aspects with a more comprehensive perspective on the subject. This innovative approach, not extensively explored in prior literature, has the potential to offer a more complete understanding of the mechanisms behind the effects of exercise in this population, thereby aiding in therapeutic planning. Furthermore, considering moderators related to intervention characteristics, context, and social aspects may shed light on result heterogeneity and provide more targeted recommendations for implementing exercise programs in real clinical settings.

## Supporting information

**S1 Checklist. PRISMA-P 2015.**

(DOCX)

**S1 Appendix. Terms used in the search strategy according to each database.**

(DOCX)

## Author Contributions

**Conceptualization:** Nuria Pérez-Romero, Christian Campos-Jara, Falonn Contreras-Osorio.

**Methodology:** Nuria Pérez-Romero, Rodrigo Ramirez-Campillo, Falonn Contreras-Osorio.

**Writing – original draft:** Nuria Pérez-Romero, Christian Campos-Jara, Enrique Cerda-Vega, Rodrigo Campos-Jara, Cristian Martínez-Salazar, Falonn Contreras-Osorio.

**Writing – review & editing:** Nuria Pérez-Romero, Caterina Pesce, Sergio Araya Sierralta, Rodrigo Ramirez-Campillo, Cristián Arellano-Roco, Falonn Contreras-Osorio.

## References

1. Degnan A, Berry K, Sweet D, Abel K, Crossley N, Edge D. Social networks and symptomatic and functional outcomes in schizophrenia: a systematic review and meta-analysis. *Soc Psychiatry Psychiatr Epidemiol.* 2018 Sep 27; 53(9):873–88. <https://doi.org/10.1007/s00127-018-1552-8> PMID: 29951929
2. Javed A, Charles A. The Importance of Social Cognition in Improving Functional Outcomes in Schizophrenia. *Front Psychiatry.* 2018 Apr 24; 9. <https://doi.org/10.3389/fpsy.2018.00157> PMID: 29740360
3. De Donatis D, Porcelli S, De Ronchi D, Merlo Pich E, Kas MJ, Bilderbeck A, et al. Social withdrawal and neurocognitive correlates in schizophrenia. *Int Clin Psychopharmacol.* 2022 May 31; 37(3):102–9. <https://doi.org/10.1097/YIC.000000000000395> PMID: 35102081
4. Asociación Americana de Psiquiatría. Manual diagnóstico y estadístico de los trastornos mentales (DSM-5®). 5th ed. Arlington V, Asociación Americana de Psiquiatría, editors. 2014.
5. Rodríguez-Testal JF, Cristina Senín-Calderón, Perona-Garcelán S. From DSM-IV-TR to DSM-5: Analysis of some changes. *International Journal of Clinical and Health Psychology.* 2014 Sep; 14(3):221–31.

6. Fernando Muñoz L, Jaramillo LE. DSM-5: ¿Cambios significativos? *Revista de la Asociación Española de Neuropsiquiatría*. 2015 Mar; 35(125):111–21.
7. Valle R. La esquizofrenia en la CIE-11: comparación con la CIE-10 y el DSM-5. *Rev Psiquiatr Salud Ment*. 2020 Apr; 13(2):95–104.
8. Mesholam-Gately RI, Giuliano AJ, Goff KP, Faraone S V., Seidman LJ. Neurocognition in first-episode schizophrenia: A meta-analytic review. *Neuropsychology*. 2009; 23(3):315–36. <https://doi.org/10.1037/a0014708> PMID: 19413446
9. Hill SK, Beers SR, Kmiec JA, Keshavan M. S., Sweeney J. A. Impairment of verbal memory and learning in antipsychotic-naïve patients with first-episode schizophrenia. *Schizophr Res*. 2004 Jun 1; 68(2–3):127–36.
10. Kitchen H, Rofail D, Heron L, Sacco P. Cognitive Impairment Associated with Schizophrenia: A Review of the Humanistic Burden. *Adv Ther*. 2012 Feb 10; 29(2):148–62. <https://doi.org/10.1007/s12325-012-0001-4> PMID: 22351433
11. Lepage M, Bodnar M, Bowie CR. Neurocognition: Clinical and Functional Outcomes in Schizophrenia. *The Canadian Journal of Psychiatry*. 2014 Jan 1; 59(1):5–12. <https://doi.org/10.1177/070674371405900103> PMID: 24444318
12. Khalil M, Hollander P, Raucher-Chéné D, Lepage M, Lavigne KM. Structural brain correlates of cognitive function in schizophrenia: A meta-analysis. *Neurosci Biobehav Rev*. 2022 Jan; 132:37–49. <https://doi.org/10.1016/j.neubiorev.2021.11.034> PMID: 34822878
13. Gebreegziabhere Y, Habatmu K, Mihretu A, Cella M, Alem A. Cognitive impairment in people with schizophrenia: an umbrella review. *Eur Arch Psychiatry Clin Neurosci*. 2022 Oct 28; 272(7):1139–55. <https://doi.org/10.1007/s00406-022-01416-6> PMID: 35633394
14. Friedman NP, Miyake A. Unity and diversity of executive functions: Individual differences as a window on cognitive structure. *Cortex*. 2017 Jan; 86:186–204. <https://doi.org/10.1016/j.cortex.2016.04.023> PMID: 27251123
15. Diamond A. Executive Functions. *Annu Rev Psychol*. 2013 Jan 3; 64(1):135–68.
16. Ruiz-Castañeda P, Santiago-Molina E, Aguirre-Loaiza H, Daza González MT. “Cool” and “Hot” Executive Functions in Patients With a Predominance of Negative Schizophrenic Symptoms. *Front Psychol*. 2020 Nov 5; 11. <https://doi.org/10.3389/fpsyg.2020.571271> PMID: 33250814
17. Savla GN, Vella L, Armstrong CC, Penn DL, Twamley EW. Deficits in Domains of Social Cognition in Schizophrenia: A Meta-Analysis of the Empirical Evidence. *Schizophr Bull*. 2013 Sep; 39(5):979–92. <https://doi.org/10.1093/schbul/sbs080> PMID: 22949733
18. Rüsç N, Tebartz van Elst L, Valerius G, Büchert M, Thiel T, Ebert D, et al. Neurochemical and structural correlates of executive dysfunction in schizophrenia. *Schizophr Res*. 2008 Feb; 99(1–3):155–63. <https://doi.org/10.1016/j.schres.2007.05.024> PMID: 17616347
19. Sánchez P, Ojeda N, Peña J, Elizagárate E, Yoller AB, Gutiérrez M, et al. Predictors of Longitudinal Changes in Schizophrenia. *J Clin Psychiatry*. 2009 Jun 15; 70(6):888–96.
20. Sawada K, Kanehara A, Sakakibara E, Eguchi S, Tada M, Satomura Y, et al. Identifying neurocognitive markers for outcome prediction of global functioning in individuals with first-episode and ultra-high-risk for psychosis. *Psychiatry Clin Neurosci*. 2017 May; 71(5):318–27. <https://doi.org/10.1111/pcn.12522> PMID: 28294477
21. Seidman LJ, Shapiro DI, Stone WS, Woodberry KA, Ronzio A, Cornblatt BA, et al. Association of Neurocognition With Transition to Psychosis. *JAMA Psychiatry*. 2016 Dec 1; 73(12):1239.
22. Mohn C, Olsson AK, van Dijk Härd I, Helldin L. Neurocognitive function and mortality in patients with schizophrenia spectrum disorders. *Schizophr Res Cogn*. 2023 Sep; 33:100284. <https://doi.org/10.1016/j.scog.2023.100284> PMID: 37078076
23. Peritogiannis V, Ninou A, Samakouri M. Mortality in Schizophrenia-Spectrum Disorders: Recent Advances in Understanding and Management. *Healthcare*. 2022 Nov 25; 10(12):2366. <https://doi.org/10.3390/healthcare10122366> PMID: 36553890
24. Walker ER, McGee RE, Druss BG. Mortality in Mental Disorders and Global Disease Burden Implications. *JAMA Psychiatry*. 2015 Apr 1; 72(4):334.
25. Correll CU, Solmi M, Croatto G, Schneider LK, Rohani-Montez SC, Fairley L, et al. Mortality in people with schizophrenia: a systematic review and meta-analysis of relative risk and aggravating or attenuating factors. *World Psychiatry*. 2022 Jun 7; 21(2):248–71. <https://doi.org/10.1002/wps.20994> PMID: 35524619
26. Favril L, Yu R, Uyar A, Sharpe M, Fazel S. Risk factors for suicide in adults: systematic review and meta-analysis of psychological autopsy studies. *Evidence Based Mental Health*. 2022 Nov; 25(4):148–55. <https://doi.org/10.1136/ebmental-2022-300549> PMID: 36162975

27. Vancampfort D, Firth J, Schuch FB, Rosenbaum S, Mugisha J, Hallgren M, et al. Sedentary behavior and physical activity levels in people with schizophrenia, bipolar disorder and major depressive disorder: a global systematic review and meta-analysis. *World Psychiatry*. 2017 Oct; 16(3):308–15. <https://doi.org/10.1002/wps.20458> PMID: 28941119
28. Olfson M, Gerhard T, Huang C, Crystal S, Stroup TS. Premature Mortality Among Adults With Schizophrenia in the United States. *JAMA Psychiatry*. 2015 Dec 1; 72(12):1172. <https://doi.org/10.1001/jamapsychiatry.2015.1737> PMID: 26509694
29. Stubbs B, Ku PW, Chung MS, Chen LJ. Relationship Between Objectively Measured Sedentary Behavior and Cognitive Performance in Patients With Schizophrenia Vs Controls. *Schizophr Bull*. 2017 Aug 23; 3(43):566–74. <https://doi.org/10.1093/schbul/sbw126> PMID: 27555659
30. Falkai P, Malchow B, Schmitt A. Aerobic exercise and its effects on cognition in schizophrenia. *Curr Opin Psychiatry*. 2017 May; 30(3):171–5. <https://doi.org/10.1097/YCO.0000000000000326> PMID: 28230631
31. Vancampfort D, Probst M, Helvik Skjaerven L, Catalán-Matamoros D, Lundvik-Gyllensten A, Gómez-Conesa A, et al. Systematic Review of the Benefits of Physical Therapy Within a Multidisciplinary Care Approach for People With Schizophrenia. *Phys Ther*. 2012 Jan 1; 92(1):11–23. <https://doi.org/10.2522/ptj.20110218> PMID: 22052946
32. Ott CV, Johnson CB, Macoveanu J, Miskowiak K. Structural changes in the hippocampus as a biomarker for cognitive improvements in neuropsychiatric disorders: A systematic review. *European Neuropsychopharmacology*. 2019 Mar; 29(3):319–29. <https://doi.org/10.1016/j.euroneuro.2019.01.105> PMID: 30654916
33. Shimada T, Ito S, Makabe A, Yamanushi A, Takenaka A, Kawano K, et al. Aerobic exercise and cognitive functioning in schizophrenia: An updated systematic review and meta-analysis. *Psychiatry Res*. 2022 Aug; 314:114656. <https://doi.org/10.1016/j.psychres.2022.114656> PMID: 35659670
34. Harvey PD, Bowie CR. Cognitive Enhancement in Schizophrenia. *Psychiatric Clinics of North America*. 2012 Sep; 35(3):683–98.
35. Firth J, Stubbs B, Rosenbaum S, Vancampfort D, Malchow B, Schuch F, et al. Aerobic Exercise Improves Cognitive Functioning in People With Schizophrenia: A Systematic Review and Meta-Analysis. *Schizophr Bull*. 2017 Aug 11; 3(43):546–56. <https://doi.org/10.1093/schbul/sbw115> PMID: 27521348
36. Liu NH, Daurmit GL, Dua T, Aquila R, Charlson F, Cuijpers P, et al. Excess mortality in persons with severe mental disorders: a multilevel intervention framework and priorities for clinical practice, policy and research agendas. *World Psychiatry*. 2017 Feb; 16(1):30–40. <https://doi.org/10.1002/wps.20384> PMID: 28127922
37. Girdler SJ, Confino JE, Woesner ME. Exercise as a Treatment for Schizophrenia: A Review. *Psychopharmacol Bull*. 2019 Feb 15; 49(1):56–69. <https://doi.org/10.1002/14651858.CD004412.pub2> PMID: 30858639
38. Maurus I, Hasan A, Röh A, Takahashi S, Rauchmann B, Keeser D, et al. Neurobiological effects of aerobic exercise, with a focus on patients with schizophrenia. *Eur Arch Psychiatry Clin Neurosci*. 2019 Aug 21; 269(5):499–515. <https://doi.org/10.1007/s00406-019-01025-w> PMID: 31115660
39. van der Stouwe ECD, van Busschbach JT, de Vries B, Cahn W, Aleman A, Pijnenborg GHM. Neural correlates of exercise training in individuals with schizophrenia and in healthy individuals: A systematic review. *Neuroimage Clin*. 2018; 19:287–301. <https://doi.org/10.1016/j.nicl.2018.04.018> PMID: 30023171
40. Firth J, Cotter J, Carney R, Yung AR. The pro-cognitive mechanisms of physical exercise in people with schizophrenia. *Br J Pharmacol*. 2017 Oct; 174(19):3161–72. <https://doi.org/10.1111/bph.13772> PMID: 28261797
41. Firth J, Cotter J, Elliott R, French P, Yung AR. A systematic review and meta-analysis of exercise interventions in schizophrenia patients. *Psychol Med*. 2015 May 4; 45(7):1343–61. <https://doi.org/10.1017/S0033291714003110> PMID: 25650668
42. Roeh A, Hasan A. Exercise for the treatment of schizophrenia: a current review and recommendations. *Deutsche Zeitschrift für Sportmedizin/German Journal of Sports Medicine*. 2021 Jun 1; 72(6):288–92.
43. Caspersen CJ, Powell KE, Christenson GM. Physical activity, exercise, and physical fitness: definitions and distinctions for health-related research. *Public health reports*. 1985; 100(2):126. PMID: 3920711
44. Hillman CH, Erickson KI, Kramer AF. Be smart, exercise your heart: exercise effects on brain and cognition. *Nat Rev Neurosci*. 2008 Jan; 9(1):58–65. <https://doi.org/10.1038/nrn2298> PMID: 18094706
45. Malchow B, Reich-Erkelenz D, Oertel-Knöchel V, Keller K, Hasan A, Schmitt A, et al. The effects of physical exercise in schizophrenia and affective disorders. *Eur Arch Psychiatry Clin Neurosci*. 2013 Sep 20; 263(6):451–67. <https://doi.org/10.1007/s00406-013-0423-2> PMID: 23873090

46. Mittal VA, Vargas T, Juston Osborne K, Dean D, Gupta T, Ristanovic I, et al. Exercise Treatments for Psychosis: a Review. *Curr Treat Options Psychiatry*. 2017 Jun 18; 4(2):152–66. <https://doi.org/10.1007/s40501-017-0112-2> PMID: 29034144
47. Xu Y, Cai Z, Fang C, Zheng J, Shan J, Yang Y. Impact of aerobic exercise on cognitive function in patients with schizophrenia during daily care: A meta-analysis. *Psychiatry Res*. 2022 Jun; 312:114560. <https://doi.org/10.1016/j.psychres.2022.114560> PMID: 35500333
48. Pesce C. Shifting the Focus From Quantitative to Qualitative Exercise Characteristics in Exercise and Cognition Research. *J Sport Exerc Psychol*. 2012 Dec; 34(6):766–86. <https://doi.org/10.1123/jsep.34.6.766> PMID: 23204358
49. Deste G, Corbo D, Nibbio G, Italia M, Dell'Ovo D, Calzavara-Pinton I, et al. Impact of Physical Exercise Alone or in Combination with Cognitive Remediation on Cognitive Functions in People with Schizophrenia: A Qualitative Critical Review. *Brain Sci*. 2023 Feb 14; 13(2):320. <https://doi.org/10.3390/brainsci13020320> PMID: 36831863
50. Cramer H, Lauche R, Klose P, Langhorst J, Dobos G. Yoga for schizophrenia: a systematic review and meta-analysis. *BMC Psychiatry*. 2013 Dec 18; 13(1):32. <https://doi.org/10.1186/1471-244X-13-32> PMID: 23327116
51. Li J, Shen J, Wu G, Tan Y, Sun Y, Keller E, et al. Mindful exercise versus non-mindful exercise for schizophrenia: A systematic review and meta-analysis of randomized controlled trials. *Complement Ther Clin Pract*. 2018 Aug; 32:17–24. <https://doi.org/10.1016/j.ctcp.2018.04.003> PMID: 30057047
52. Pesce C, Vazou S, Benzing V, Álvarez-Bueno C, Anzeneder S, Mavilidi MF, et al. Effects of chronic physical activity on cognition across the lifespan: a systematic meta-review of randomized controlled trials and realist synthesis of contextualized mechanisms. *Int Rev Sport Exerc Psychol*. 2021 Jun 8; 1–39.
53. Vella SA, Sutcliffe JT, Fernandez D, Liddelow C, Aidman E, Teychenne M, et al. Context matters: A review of reviews examining the effects of contextual factors in physical activity interventions on mental health and wellbeing. *Ment Health Phys Act*. 2023 Oct; 25:100520.
54. Shojania KG, Sampson M, Ansari MT, Ji J, Doucette S, Moher D. How Quickly Do Systematic Reviews Go Out of Date? A Survival Analysis. *Ann Intern Med*. 2007 Aug 21; 147(4):224. <https://doi.org/10.7326/0003-4819-147-4-200708210-00179> PMID: 17638714
55. Kern RS, Nuechterlein KH, Green MF, Baade LE, Fenton WS, Gold JM, et al. The MATRICS Consensus Cognitive Battery, Part 2: Co-Norming and Standardization. *American Journal of Psychiatry*. 2008 Feb; 165(2):214–20. <https://doi.org/10.1176/appi.ajp.2007.07010043> PMID: 18172018
56. Nuechterlein KH, Subotnik KL, Green MF, Ventura J, Asarnow RF, Gitlin MJ, et al. Neurocognitive Predictors of Work Outcome in Recent-Onset Schizophrenia. *Schizophr Bull*. 2011 Sep 1; 37(suppl 2): S33–40. <https://doi.org/10.1093/schbul/sbr084> PMID: 21860045
57. Duijkers JCLM, Vissers CThWM, Egger JIM. Unraveling Executive Functioning in Dual Diagnosis. *Front Psychol*. 2016 Jun 28; 7. <https://doi.org/10.3389/fpsyg.2016.00979> PMID: 27445939
58. Mihaljević-Peleš A, Bajs Janović M, Šagud M, Živković M, Janović Š, Jevtović S. Cognitive deficit in schizophrenia: an overview. *Psychiatr Danub*. 2019 Jun; 31(Suppl 2):139–42. PMID: 31158113
59. Moher D, Shamseer L, Clarke M, Ghersi D, Liberati A, Petticrew M, et al. Preferred reporting items for systematic review and meta-analysis protocols (PRISMA-P) 2015 statement. *Syst Rev*. 2015 Dec 1; 4(1):1. <https://doi.org/10.1186/2046-4053-4-1> PMID: 25554246
60. Contreras-Osorio F, Ramirez-Campillo R, Cerda-Vega E, Campos-Jara R, Martínez-Salazar C, Reigal RE, et al. Effects of Physical Exercise on Executive Function in Adults with Depression: A Systematic Review and Meta-Analysis Protocol. *Sustainability*. 2022 Nov 16; 14(22):15158.
61. Thompson PD, Arena R, Riebe D, Pescatello LS. ACSM's New Preparticipation Health Screening Recommendations from ACSM's Guidelines for Exercise Testing and Prescription, Ninth Edition. *Curr Sports Med Rep*. 2013; 12(4):215–7. <https://doi.org/10.1249/JSR.0b013e31829a68cf> PMID: 23851406
62. Gaertner B, BATTERY AK, Finger JD, Wolfsgruber S, Wagner M, Busch MA. Physical exercise and cognitive function across the life span: Results of a nationwide population-based study. *J Sci Med Sport*. 2018 May; 21(5):489–94. <https://doi.org/10.1016/j.jsams.2017.08.022> PMID: 28919495
63. Mikkelsen K, Stojanovska L, Polenakovic M, Bosevski M, Apostolopoulos V. Exercise and mental health. *Maturitas*. 2017 Dec; 106:48–56. <https://doi.org/10.1016/j.maturitas.2017.09.003> PMID: 29150166
64. Schuch FB, Vancampfort D. Physical activity, exercise, and mental disorders: it is time to move on. *Trends Psychiatry Psychother*. 2021; <https://doi.org/10.47626/2237-6089-2021-0237> PMID: 33890431
65. Oertel-Knöchel V, Mehler P, Thiel C, Steinbrecher K, Malchow B, Tesky V, et al. Effects of aerobic exercise on cognitive performance and individual psychopathology in depressive and schizophrenia patients. *Eur Arch Psychiatry Clin Neurosci*. 2014 Oct 2; 264(7):589–604. <https://doi.org/10.1007/s00406-014-0485-9> PMID: 24487666

66. Frost A, Moussaoui S, Kaur J, Aziz S, Fukuda K, Niemeier M. Is the n-back task a measure of unstructured working memory capacity? Towards understanding its connection to other working memory tasks. *Acta Psychol (Amst)*. 2021 Sep; 219:103398. <https://doi.org/10.1016/j.actpsy.2021.103398> PMID: 34419689
67. Barzykowski K, Wereszczyński M, Hajdas S, Radel R. Cognitive inhibition behavioral tasks in online and laboratory settings: Data from Stroop, SART and Eriksen Flanker tasks. *Data Brief*. 2022 Aug; 43:108398. <https://doi.org/10.1016/j.dib.2022.108398> PMID: 35789910
68. Jurick SM, Eglit GML, Delis DC, Bondi MW, Jak AJ. D-KEFS trail making test as an embedded performance validity measure. *J Clin Exp Neuropsychol*. 2022 Jan 2; 44(1):62–72. <https://doi.org/10.1080/13803395.2022.2073334> PMID: 35603485
69. Ho MC, Hsu YC, Lu ML, Gossop M, Chen VCH. ‘Cool’ and ‘Hot’ executive functions in suicide attempters with major depressive disorder. *J Affect Disord*. 2018 Aug; 235:332–40. <https://doi.org/10.1016/j.jad.2018.04.057> PMID: 29665516
70. Tseng HH, Chen SH, Liu CM, Howes O, Huang YL, Hsieh MH, et al. Facial and Prosodic Emotion Recognition Deficits Associate with Specific Clusters of Psychotic Symptoms in Schizophrenia. *PLoS One*. 2013 Jun 20; 8(6):e66571. <https://doi.org/10.1371/journal.pone.0066571> PMID: 23818944
71. Page MJ, McKenzie JE, Bossuyt PM, Boutron I, Hoffmann TC, Mulrow CD, et al. The PRISMA 2020 statement: an updated guideline for reporting systematic reviews. *BMJ*. 2021 Mar 29;n71. <https://doi.org/10.1136/bmj.n71> PMID: 33782057
72. Suzuki H, Sakuma N, Kobayashi M, Ogawa S, Inagaki H, Eda Hiro A, et al. Normative Data of the Trail Making Test Among Urban Community-Dwelling Older Adults in Japan. *Front Aging Neurosci*. 2022 May 25; 14. <https://doi.org/10.3389/fnagi.2022.832158> PMID: 35693348
73. Drevon D, Fursa SR, Malcolm AL. Intercoder Reliability and Validity of WebPlotDigitizer in Extracting Graphed Data. *Behav Modif*. 2017 Mar 22; 41(2):323–39. <https://doi.org/10.1177/0145445516673998> PMID: 27760807
74. Contreras-Osorio F, Ramirez-Campillo R, Cerda-Vega E, Campos-Jara R, Martínez-Salazar C, Arana R, et al. Effects of Sport-Based Exercise Interventions on Executive Function in Older Adults: A Systematic Review and Meta-Analysis. *Int J Environ Res Public Health*. 2022 Oct 1; 19(19):12573. <https://doi.org/10.3390/ijerph191912573> PMID: 36231873
75. Maher CG, Sherrington C, Herbert RD, Moseley AM, Elkins M. Reliability of the PEDro scale for rating quality of randomized controlled trials. *Phys Ther*. 2003 Aug; 83(8):713–21. PMID: 12882612
76. Zadro S, Stapleton P. Does Reiki Benefit Mental Health Symptoms Above Placebo? *Front Psychol*. 2022 Jul 12; 13. <https://doi.org/10.3389/fpsyg.2022.897312> PMID: 35911042
77. Lane B, McCullagh R, Cardoso JR, McVeigh JG. The effectiveness of group and home-based exercise on psychological status in people with ankylosing spondylitis: A systematic review and meta-analysis. *Musculoskeletal Care*. 2022 Dec 18; 20(4):758–71. <https://doi.org/10.1002/msc.1641> PMID: 35437893
78. Xia H sha, Li Y xi, Zhang Q yun, Zhong D ling, Liu X bo, Gou X yun, et al. Attention bias modification for depression: A systematic review and meta-analysis. *Front Psychiatry*. 2023 Mar 10; 14. <https://doi.org/10.3389/fpsyg.2023.1098610> PMID: 36970284
79. Sterne JAC, Sutton AJ, Ioannidis JPA, Terrin N, Jones DR, Lau J, et al. Recommendations for examining and interpreting funnel plot asymmetry in meta-analyses of randomised controlled trials. *BMJ*. 2011 Jul 22; 343(jul22 1):d4002–d4002. <https://doi.org/10.1136/bmj.d4002> PMID: 21784880
80. Sterne JAC, Savović J, Page MJ, Elbers RG, Blencowe NS, Boutron I, et al. RoB 2: a revised tool for assessing risk of bias in randomised trials. *BMJ*. 2019 Aug 28; 368:l4898. <https://doi.org/10.1136/bmj.l4898> PMID: 31462531
81. Balshem H, Helfand M, Schünemann HJ, Oxman AD, Kunz R, Brozek J, et al. GRADE guidelines: 3. Rating the quality of evidence. *J Clin Epidemiol*. 2011 Apr; 64(4):401–6. <https://doi.org/10.1016/j.jclinepi.2010.07.015> PMID: 21208779
82. Guyatt G, Oxman AD, Akl EA, Kunz R, Vist G, Brozek J, et al. GRADE guidelines: 1. Introduction—GRADE evidence profiles and summary of findings tables. *J Clin Epidemiol*. 2011 Apr; 64(4):383–94. <https://doi.org/10.1016/j.jclinepi.2010.04.026> PMID: 21195583
83. Higgins JPT, Thompson SG. Quantifying heterogeneity in a meta-analysis. *Stat Med*. 2002 Jun 15; 21(11):1539–58. <https://doi.org/10.1002/sim.1186> PMID: 12111919
84. García-Hermoso A, Ramírez-Campillo R, Izquierdo M. Is Muscular Fitness Associated with Future Health Benefits in Children and Adolescents? A Systematic Review and Meta-Analysis of Longitudinal Studies. *Sports Medicine*. 2019 Jul 5; 49(7):1079–94. <https://doi.org/10.1007/s40279-019-01098-6> PMID: 30953308
85. Moran J, Ramirez-Campillo R, Granacher U. Effects of Jumping Exercise on Muscular Power in Older Adults: A Meta-Analysis. *Sports Medicine*. 2018 Dec 20; 48(12):2843–57. <https://doi.org/10.1007/s40279-018-1002-5> PMID: 30341594

86. Abt G, Boreham C, Davison G, Jackson R, Wallace E, Williams AM. Registered Reports in the Journal of Sports Sciences. *J Sports Sci.* 2021 Aug 18; 39(16):1789–90. <https://doi.org/10.1080/02640414.2021.1950974> PMID: 34379576
87. Hopkins WG, Marshall SW, Batterham AM, Hanin J. Progressive Statistics for Studies in Sports Medicine and Exercise Science. *Med Sci Sports Exerc.* 2009 Jan; 41(1):3–12. <https://doi.org/10.1249/MSS.0b013e31818cb278> PMID: 19092709
88. Kadlec D, Sainani KL, Nimphius S. With Great Power Comes Great Responsibility: Common Errors in Meta-Analyses and Meta-Regressions in Strength & Conditioning Research. *Sports Medicine.* 2023 Feb 8; 53(2):313–25. <https://doi.org/10.1007/s40279-022-01766-0> PMID: 36208412
89. Viechtbauer W, Cheung MWL. Outlier and influence diagnostics for meta-analysis. *Res Synth Methods.* 2010 Apr; 1(2):112–25. <https://doi.org/10.1002/jrsm.11> PMID: 26061377
90. Egger M, Smith GD, Schneider M, Minder C. Bias in meta-analysis detected by a simple, graphical test. *BMJ.* 1997 Sep 13; 315(7109):629–34. <https://doi.org/10.1136/bmj.315.7109.629> PMID: 9310563
91. Duval S, Tweedie R. Trim and Fill: A Simple Funnel-Plot-Based Method of Testing and Adjusting for Publication Bias in Meta-Analysis. *Biometrics.* 2000 Jun; 56(2):455–63. <https://doi.org/10.1111/j.0006-341x.2000.00455.x> PMID: 10877304
92. Shi L, Lin L. The trim-and-fill method for publication bias: practical guidelines and recommendations based on a large database of meta-analyses. *Medicine.* 2019 Jun; 98(23):e15987. <https://doi.org/10.1097/MD.00000000000015987> PMID: 31169736
93. Page MJ, Higgins JPT, Sterne JAC. Assessing risk of bias due to missing results in a synthesis. In: Higgins JPT, Thomas J, Chandler J, Cumpston M, Li T, Page MJ, et al., editors. *Cochrane Handbook for Systematic Reviews of Interventions version 6.3.* Second. 2019. p. 365.
94. Dauwan M, Begemann MJH, Slot MIE, Lee EHM, Scheltens P, Sommer IEC. Physical exercise improves quality of life, depressive symptoms, and cognition across chronic brain disorders: a trans-diagnostic systematic review and meta-analysis of randomized controlled trials. *J Neurol.* 2021 Apr 14; 268(4):1222–46. <https://doi.org/10.1007/s00415-019-09493-9> PMID: 31414194
95. Serra L, Petrosini L, Mandolesi L, Bonarota S, Balsamo F, Bozzali M, et al. Walking, Running, Swimming: An Analysis of the Effects of Land and Water Aerobic Exercises on Cognitive Functions and Neural Substrates. *Int J Environ Res Public Health.* 2022 Dec 6; 19(23):16310. <https://doi.org/10.3390/ijerph192316310> PMID: 36498383
96. Landrigan JF, Bell T, Crowe M, Clay OJ, Mirman D. Lifting cognition: a meta-analysis of effects of resistance exercise on cognition. *Psychol Res.* 2020 Jul 9; 84(5):1167–83. <https://doi.org/10.1007/s00426-019-01145-x> PMID: 30627769
97. Silveira-Rodrigues JG, Marinho NG de HN, Faria LO, Pereira DS, Soares DD. Combined Training Improves Executive Functions Without Changing Brain-Derived Neurotrophic Factor Levels of Middle-Aged and Older Adults with Type 2 Diabetes. *Experimental and Clinical Endocrinology & Diabetes.* 2023 Apr 5; <https://doi.org/10.1055/a-2069-4050> PMID: 37019176
98. Chen FT, Etnier JL, Chan KH, Chiu PK, Hung TM, Chang YK. Effects of Exercise Training Interventions on Executive Function in Older Adults: A Systematic Review and Meta-Analysis. *Sports Medicine.* 2020 Aug 23; 50(8):1451–67. <https://doi.org/10.1007/s40279-020-01292-x> PMID: 32447717
99. Leyland LA, Spencer B, Beale N, Jones T, van Reekum CM. The effect of cycling on cognitive function and well-being in older adults. *PLoS One.* 2019 Feb 20; 14(2):e0211779. <https://doi.org/10.1371/journal.pone.0211779> PMID: 30785893
100. Mitchell JJ, Hamer M, Blodgett JM, Wannamethee GS, Jefferis BJ. Associations between sporting physical activity and cognition in mid and later-life: Evidence from two cohorts. *Scand J Med Sci Sports.* 2023 May 30; <https://doi.org/10.1111/sms.14412> PMID: 37254468
101. Shamsi S, Lau A, Lencz T, Burdick KE, DeRosse P, Brenner R, et al. Cognitive and symptomatic predictors of functional disability in schizophrenia. *Schizophr Res.* 2011 Mar; 126(1–3):257–64. <https://doi.org/10.1016/j.schres.2010.08.007> PMID: 20828991
102. World Health Organization. Esquizofrenia [Internet]. 2022 [cited 2023 May 4]. <https://www.who.int/es/news-room/fact-sheets/detail/schizophrenia>
103. Fucetola R, Seidman LJ, Kremen WS, Faraone S V, Goldstein JM, Tsuang MT. Age and neuropsychologic function in schizophrenia: a decline in executive abilities beyond that observed in healthy volunteers. *Biol Psychiatry.* 2000 Jul; 48(2):137–46. [https://doi.org/10.1016/s0006-3223\(00\)00240-7](https://doi.org/10.1016/s0006-3223(00)00240-7) PMID: 10903410
